# Supplementary material for: A proteomic atlas of senescence-associated secretomes for aging biomarker development
Source: PubMed Central journal article supplement (PMC6964821; doi:10.1371/journal.pbio.3000599), 2020-01-16
Supplement: pbio.3000599.s015.pdf [file pbio.3000599.s015.pdf]

# MMP1

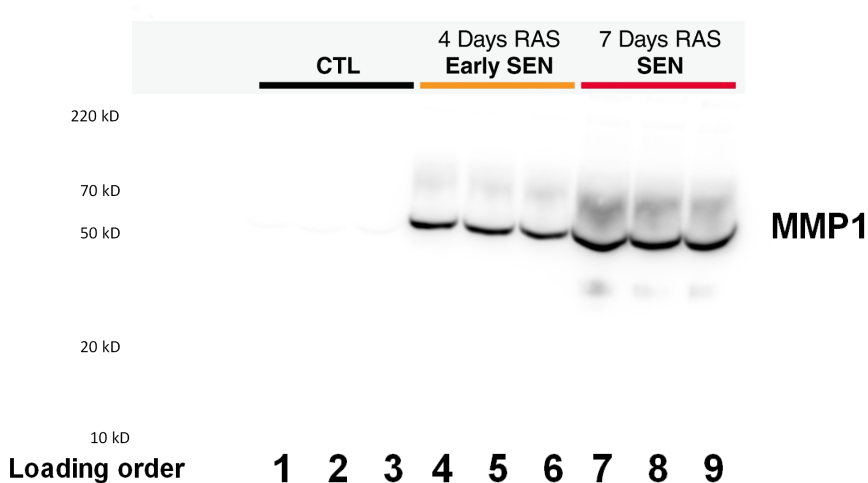

Azure c600 Imager  
cSeries Capture Software  
Chemi - Autoexposure

Fig S3A

# GDF15

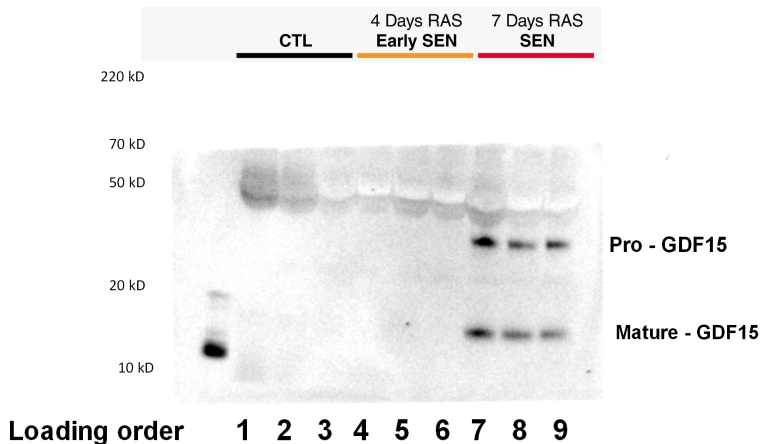

Azure c600 Imager  
cSeries Capture Software  
Chemi - Autoexposure

**Fig S3A**

# SERPINE1

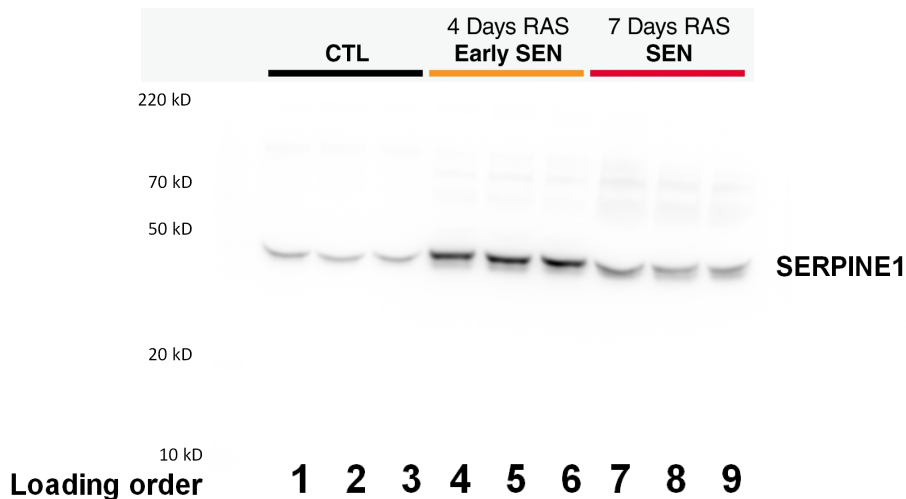

Azure c600 Imager  
cSeries Capture Software  
Chemi - Autoexposure

**Fig S3A**

# STC1

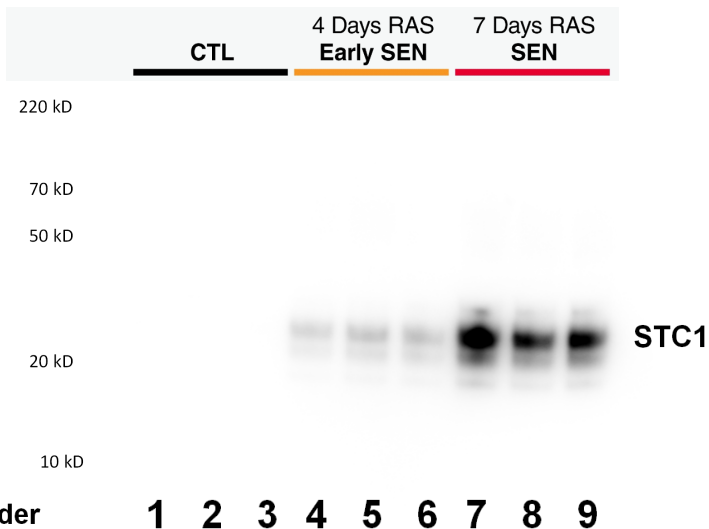

Loading order  
Azure c600 Imager  
cSeries Capture Software  
Chemi - Autoexposure

**Fig S3A**
